# Supplementary material for: Phylogenomic Analyses of the Genus Pseudomonas Lead to the Rearrangement of Several Species and the Definition of New Genera
Source: MDPI journal article supplement (doi:10.3390/biology10080782), 2021-08-16
Supplement: s1 [file s1]

**Table S5:** ANIb values shared among different *Xanthomonas* type strains and *P. cissicola* CCUG 18839<sup>T</sup>

|                                                      | <i>X. oryzae</i> ICMP3125 <sup>T</sup> | <i>X. codiae</i> CFBP4690 <sup>T</sup> | <i>X. maliensis</i> LMG27592 <sup>T</sup> | <i>X. cassavae</i> CFBP4642 <sup>T</sup> | <i>X. bromi</i> LMG947 <sup>T</sup> | <i>X. cucurbitae</i> CFBP2542 <sup>T</sup> | <i>X. dyei</i> CFBP7245 <sup>T</sup> | <i>X. prunicola</i> CFBP8353 <sup>T</sup> | <i>X. hyacinthi</i> CFBP1156 <sup>T</sup> | <i>X. albilineans</i> CFBP2523 <sup>T</sup> | <i>X. citri</i> LMG9322 <sup>T</sup> | <i>X. campestris</i> ATCC33913 <sup>T</sup> | <i>X. cynarae</i> CFBP4188 <sup>T</sup> | <i>X. euvesicatoria</i> LMG27970 <sup>T</sup> | <i>X. floricola</i> WHRI8848 <sup>T</sup> | <i>X. vasicola</i> CFBP2543 <sup>T</sup> | <i>X. arboricola</i> CFBP2528 <sup>T</sup> | <i>X. translucens</i> DSM18974 <sup>T</sup> | <i>X. sacchari</i> CFBP4641 <sup>T</sup> | <i>X. axonopodis</i> DSM3585 <sup>T</sup> | <i>X. nasturtii</i> WHRI8853 <sup>T</sup> | <i>P. cissicola</i> CCUG 18839 <sup>T</sup> | <i>X. pisi</i> DSM18956 <sup>T</sup> | <i>X. perforans</i> DSM18975 <sup>T</sup> | <i>X. theicola</i> CFBP4691 <sup>T</sup> | <i>X. vesicatoria</i> LMG911 <sup>T</sup> | <i>X. populi</i> CFBP1817 <sup>T</sup> |
|------------------------------------------------------|----------------------------------------|----------------------------------------|-------------------------------------------|------------------------------------------|-------------------------------------|--------------------------------------------|--------------------------------------|-------------------------------------------|-------------------------------------------|---------------------------------------------|--------------------------------------|---------------------------------------------|-----------------------------------------|-----------------------------------------------|-------------------------------------------|------------------------------------------|--------------------------------------------|---------------------------------------------|------------------------------------------|-------------------------------------------|-------------------------------------------|---------------------------------------------|--------------------------------------|-------------------------------------------|------------------------------------------|-------------------------------------------|----------------------------------------|
| <i>X. oryzae</i> ICMP3125 <sup>T</sup>               | 100                                    | 86.31                                  | 82.62                                     | 86.61                                    | 89.23                               | 85.57                                      | 86.15                                | 91.14                                     | 79.58                                     | 77.92                                       | 89.96                                | 84.89                                       | 86.54                                   | 89.89                                         | 86.44                                     | 91.21                                    | 86.88                                      | 80.03                                       | 79.42                                    | 89.61                                     | 88.77                                     | 89.78                                       | 86.43                                | 90.00                                     | 79.61                                    | 85.96                                     | 85.58                                  |
| <i>X. codiae</i> CFBP4690 <sup>T</sup>               | 86.07                                  | 100                                    | 83.22                                     | 91.55                                    | 86.53                               | 89.15                                      | 87.13                                | 86.21                                     | 80.72                                     | 78.41                                       | 86.24                                | 85.53                                       | 86.23                                   | 86.53                                         | 91.38                                     | 85.97                                    | 86.96                                      | 80.71                                       | 80.28                                    | 86.24                                     | 86.95                                     | 86.29                                       | 87.35                                | 86.42                                     | 80.53                                    | 87.19                                     | 85.69                                  |
| <i>X. maliensis</i> LMG27592 <sup>T</sup>            | 82.56                                  | 83.07                                  | 100                                       | 82.88                                    | 82.44                               | 82.54                                      | 82.46                                | 82.21                                     | 79.94                                     | 77.75                                       | 82.63                                | 82.77                                       | 82.56                                   | 82.94                                         | 82.85                                     | 82.54                                    | 83.25                                      | 79.90                                       | 79.71                                    | 82.75                                     | 82.82                                     | 82.51                                       | 82.67                                | 83.00                                     | 79.69                                    | 82.39                                     | 82.11                                  |
| <i>X. cassavae</i> CFBP4642 <sup>T</sup>             | 86.40                                  | 91.63                                  | 82.97                                     | 100                                      | 86.75                               | 89.19                                      | 87.37                                | 86.45                                     | 80.43                                     | 78.11                                       | 86.77                                | 85.67                                       | 86.59                                   | 87.13                                         | 93.13                                     | 86.25                                    | 87.72                                      | 80.43                                       | 80.17                                    | 86.48                                     | 87.16                                     | 86.83                                       | 87.75                                | 87.05                                     | 80.20                                    | 87.41                                     | 85.90                                  |
| <i>X. bromi</i> LMG947 <sup>T</sup>                  | 89.29                                  | 86.58                                  | 82.58                                     | 86.82                                    | 100                                 | 86.04                                      | 86.85                                | 89.47                                     | 79.95                                     | 77.89                                       | 89.22                                | 85.15                                       | 86.65                                   | 89.16                                         | 86.89                                     | 89.41                                    | 87.00                                      | 80.10                                       | 79.63                                    | 89.17                                     | 88.77                                     | 89.21                                       | 86.89                                | 89.13                                     | 79.79                                    | 86.91                                     | 85.97                                  |
| <i>X. cucurbitae</i> CFBP2542 <sup>T</sup>           | 85.45                                  | 89.18                                  | 82.75                                     | 89.09                                    | 86.08                               | 100                                        | 86.47                                | 85.47                                     | 80.14                                     | 77.91                                       | 85.71                                | 85.10                                       | 85.60                                   | 85.85                                         | 89.49                                     | 85.50                                    | 86.25                                      | 80.28                                       | 79.97                                    | 85.55                                     | 86.19                                     | 85.68                                       | 86.93                                | 85.90                                     | 79.93                                    | 86.65                                     | 85.03                                  |
| <i>X. dyei</i> CFBP7245 <sup>T</sup>                 | 86.08                                  | 87.03                                  | 82.48                                     | 87.27                                    | 86.77                               | 86.42                                      | 100                                  | 86.47                                     | 79.93                                     | 77.87                                       | 86.19                                | 85.50                                       | 86.75                                   | 86.36                                         | 88.02                                     | 86.02                                    | 86.93                                      | 80.16                                       | 79.60                                    | 85.97                                     | 87.31                                     | 86.23                                       | 91.06                                | 86.24                                     | 79.77                                    | 90.32                                     | 86.20                                  |
| <i>X. prunicola</i> CFBP8353 <sup>T</sup>            | 91.03                                  | 86.13                                  | 82.34                                     | 86.38                                    | 89.28                               | 85.37                                      | 86.53                                | 100                                       | 79.56                                     | 77.42                                       | 89.57                                | 85.01                                       | 86.61                                   | 89.65                                         | 86.62                                     | 90.85                                    | 87.02                                      | 79.70                                       | 79.15                                    | 89.30                                     | 88.65                                     | 89.60                                       | 87.56                                | 89.61                                     | 79.34                                    | 86.33                                     | 85.96                                  |
| <i>X. hyacinthi</i> CFBP1156 <sup>T</sup>            | 79.61                                  | 80.67                                  | 79.97                                     | 80.29                                    | 79.87                               | 80.22                                      | 79.90                                | 79.63                                     | 100                                       | 83.63                                       | 79.88                                | 80.09                                       | 80.00                                   | 80.01                                         | 80.36                                     | 79.40                                    | 80.64                                      | 92.31                                       | 87.59                                    | 79.77                                     | 80.05                                     | 79.94                                       | 80.12                                | 79.98                                     | 90.47                                    | 79.78                                     | 79.62                                  |
| <i>X. albilineans</i> CFBP2523 <sup>T</sup>          | 77.96                                  | 78.46                                  | 78.02                                     | 78.26                                    | 77.85                               | 77.95                                      | 77.97                                | 77.55                                     | 83.78                                     | 100                                         | 77.99                                | 78.09                                       | 78.03                                   | 78.04                                         | 78.21                                     | 77.83                                    | 78.36                                      | 83.47                                       | 84.15                                    | 77.95                                     | 78.05                                     | 77.97                                       | 78.08                                | 78.02                                     | 83.31                                    | 78.01                                     | 77.68                                  |
| <i>X. citri</i> LMG9322 <sup>T</sup>                 | 89.77                                  | 86.27                                  | 82.74                                     | 86.79                                    | 89.14                               | 85.72                                      | 86.25                                | 89.63                                     | 79.94                                     | 77.89                                       | 100                                  | 85.03                                       | 86.49                                   | 93.90                                         | 86.43                                     | 89.82                                    | 87.02                                      | 79.89                                       | 79.63                                    | 92.80                                     | 88.70                                     | 98.26                                       | 86.54                                | 93.95                                     | 79.74                                    | 86.04                                     | 85.97                                  |
| <i>X. campestris</i> ATCC33913 <sup>T</sup>          | 84.93                                  | 85.48                                  | 82.78                                     | 85.61                                    | 85.11                               | 85.02                                      | 85.47                                | 85.05                                     | 80.08                                     | 77.95                                       | 85.05                                | 100                                         | 85.87                                   | 85.16                                         | 85.61                                     | 84.90                                    | 86.17                                      | 80.39                                       | 79.84                                    | 84.89                                     | 85.54                                     | 85.17                                       | 85.46                                | 85.15                                     | 79.89                                    | 85.28                                     | 85.13                                  |
| <i>X. cynarae</i> CFBP4188 <sup>T</sup>              | 86.38                                  | 86.24                                  | 82.64                                     | 86.54                                    | 86.56                               | 85.58                                      | 86.84                                | 86.58                                     | 79.97                                     | 77.93                                       | 86.50                                | 85.81                                       | 100                                     | 86.54                                         | 86.45                                     | 86.32                                    | 89.39                                      | 80.17                                       | 79.58                                    | 86.28                                     | 87.40                                     | 86.56                                       | 86.99                                | 86.42                                     | 79.75                                    | 86.27                                     | 90.68                                  |
| <i>X. euvesicatoria</i> LMG27970 <sup>T</sup>        | 89.96                                  | 86.61                                  | 83.17                                     | 86.94                                    | 89.17                               | 85.86                                      | 86.41                                | 89.67                                     | 80.19                                     | 78.18                                       | 93.86                                | 85.28                                       | 86.67                                   | 100                                           | 86.65                                     | 89.92                                    | 87.12                                      | 80.42                                       | 79.98                                    | 92.74                                     | 88.69                                     | 93.98                                       | 86.67                                | 98.53                                     | 80.12                                    | 86.21                                     | 86.09                                  |
| <i>X. floricola</i> WHRI8848 <sup>T</sup>            | 86.24                                  | 91.48                                  | 82.99                                     | 93.10                                    | 86.84                               | 89.53                                      | 88.01                                | 86.57                                     | 80.38                                     | 78.17                                       | 86.47                                | 85.60                                       | 86.46                                   | 86.67                                         | 100                                       | 86.11                                    | 87.17                                      | 80.52                                       | 80.05                                    | 86.18                                     | 87.21                                     | 86.44                                       | 88.88                                | 86.55                                     | 80.08                                    | 87.89                                     | 85.82                                  |
| <i>X. vasicola</i> CFBP2543 <sup>T</sup>             | 91.16                                  | 86.06                                  | 82.56                                     | 86.33                                    | 89.36                               | 85.39                                      | 86.05                                | 90.98                                     | 79.47                                     | 77.74                                       | 89.94                                | 84.92                                       | 86.35                                   | 89.96                                         | 86.21                                     | 100                                      | 86.69                                      | 79.81                                       | 79.25                                    | 89.42                                     | 88.69                                     | 89.91                                       | 86.29                                | 90.01                                     | 79.28                                    | 85.98                                     | 85.84                                  |
| <i>X. arboricola</i> CFBP2528 <sup>T</sup>           | 86.71                                  | 86.92                                  | 83.24                                     | 87.65                                    | 86.92                               | 86.29                                      | 86.98                                | 87.06                                     | 80.64                                     | 78.26                                       | 86.91                                | 86.12                                       | 89.41                                   | 86.96                                         | 87.20                                     | 86.65                                    | 100                                        | 80.66                                       | 80.23                                    | 86.63                                     | 87.59                                     | 87.00                                       | 87.79                                | 86.88                                     | 80.31                                    | 86.77                                     | 88.49                                  |
| <i>X. translucens</i> DSM18974 <sup>T</sup>          | 79.83                                  | 80.61                                  | 80.05                                     | 80.34                                    | 79.91                               | 80.19                                      | 80.06                                | 79.88                                     | 92.23                                     | 83.50                                       | 79.88                                | 80.21                                       | 80.01                                   | 80.26                                         | 80.40                                     | 79.75                                    | 80.67                                      | 100                                         | 86.99                                    | 79.91                                     | 80.23                                     | 80.15                                       | 80.20                                | 79.94                                     | 89.83                                    | 79.95                                     | 79.74                                  |
| <i>X. sacchari</i> CFBP4641 <sup>T</sup>             | 79.42                                  | 80.30                                  | 79.87                                     | 80.12                                    | 79.46                               | 79.89                                      | 79.60                                | 79.37                                     | 87.43                                     | 84.17                                       | 79.73                                | 79.83                                       | 79.57                                   | 79.95                                         | 80.01                                     | 79.22                                    | 80.28                                      | 87.02                                       | 100                                      | 79.52                                     | 79.71                                     | 79.72                                       | 79.87                                | 79.76                                     | 86.70                                    | 79.36                                     | 79.16                                  |
| <i>X. axonopodis</i> DSM3585 <sup>T</sup>            | 89.45                                  | 86.23                                  | 82.86                                     | 86.47                                    | 89.12                               | 85.49                                      | 86.10                                | 89.33                                     | 79.68                                     | 77.94                                       | 92.80                                | 84.93                                       | 86.28                                   | 92.75                                         | 86.27                                     | 89.40                                    | 86.67                                      | 79.98                                       | 79.53                                    | 100                                       | 88.49                                     | 92.69                                       | 86.30                                | 92.84                                     | 79.74                                    | 85.95                                     | 85.67                                  |
| <i>X. nasturtii</i> WHRI8853 <sup>T</sup>            | 88.73                                  | 87.01                                  | 82.81                                     | 87.11                                    | 88.86                               | 86.32                                      | 87.42                                | 88.74                                     | 80.07                                     | 77.96                                       | 88.74                                | 85.65                                       | 87.41                                   | 88.69                                         | 87.21                                     | 88.72                                    | 87.59                                      | 80.35                                       | 79.74                                    | 88.58                                     | 100                                       | 88.71                                       | 87.66                                | 88.70                                     | 79.87                                    | 87.39                                     | 86.68                                  |
| <i>Pseudomonas cissicola</i> CCUG 18839 <sup>T</sup> | 89.80                                  | 86.23                                  | 82.62                                     | 86.73                                    | 89.13                               | 85.70                                      | 86.22                                | 89.65                                     | 79.90                                     | 77.84                                       | 98.30                                | 85.07                                       | 86.60                                   | 94.04                                         | 86.47                                     | 89.97                                    | 86.97                                      | 80.34                                       | 79.67                                    | 92.66                                     | 88.62                                     | 100                                         | 86.49                                | 93.98                                     | 79.88                                    | 86.01                                     | 85.96                                  |
| <i>X. pisi</i> DSM18956 <sup>T</sup>                 | 86.31                                  | 87.37                                  | 82.82                                     | 87.66                                    | 86.88                               | 86.85                                      | 91.14                                | 87.61                                     | 80.06                                     | 77.89                                       | 86.53                                | 85.52                                       | 86.99                                   | 86.61                                         | 88.99                                     | 86.23                                    | 87.76                                      | 80.22                                       | 79.66                                    | 86.45                                     | 87.63                                     | 86.56                                       | 100                                  | 86.60                                     | 79.98                                    | 90.10                                     | 86.31                                  |

|                                           |       |       |       |       |       |       |       |       |       |       |       |       |       |       |       |       |       |       |       |       |       |       |       |       |       |       |       |
|-------------------------------------------|-------|-------|-------|-------|-------|-------|-------|-------|-------|-------|-------|-------|-------|-------|-------|-------|-------|-------|-------|-------|-------|-------|-------|-------|-------|-------|-------|
| <i>X. perforans</i> DSM18975 <sup>T</sup> | 89.87 | 86.51 | 83.09 | 87.02 | 89.10 | 85.87 | 86.32 | 89.73 | 79.98 | 78.00 | 94.00 | 85.16 | 86.54 | 98.55 | 86.57 | 89.93 | 86.91 | 80.12 | 79.72 | 92.90 | 88.77 | 94.03 | 86.58 | 100   | 79.94 | 86.17 | 86.00 |
| <i>X. theicola</i> CFBP4691 <sup>T</sup>  | 79.79 | 80.62 | 79.86 | 80.39 | 79.79 | 80.02 | 79.91 | 79.55 | 90.41 | 83.32 | 79.81 | 79.97 | 79.68 | 80.10 | 80.51 | 79.54 | 80.45 | 89.99 | 86.97 | 80.00 | 80.22 | 79.94 | 80.31 | 80.08 | 100   | 79.84 | 79.55 |
| <i>X. vesicatoria</i> LMG911 <sup>T</sup> | 85.89 | 87.23 | 82.46 | 87.41 | 86.79 | 86.53 | 90.35 | 86.30 | 79.79 | 77.77 | 86.06 | 85.24 | 86.29 | 86.08 | 87.90 | 85.86 | 86.78 | 79.98 | 79.40 | 85.92 | 87.34 | 86.08 | 90.12 | 86.07 | 79.56 | 100   | 85.69 |
| <i>X. populi</i> CFBP1817 <sup>T</sup>    | 85.79 | 85.66 | 82.23 | 85.94 | 85.91 | 84.96 | 86.13 | 85.97 | 79.63 | 77.68 | 85.92 | 85.13 | 90.77 | 86.11 | 85.82 | 85.82 | 88.51 | 79.77 | 79.22 | 85.74 | 86.68 | 86.06 | 86.26 | 85.97 | 79.63 | 85.68 | 100   |

---
