# Supplementary material for: Phylogenomic Analyses of the Genus Pseudomonas Lead to the Rearrangement of Several Species and the Definition of New Genera
Source: MDPI journal article supplement (doi:10.3390/biology10080782), 2021-08-16
Supplement: s1 [file s1]

**Table S3:** ANIb values shared among different *Stenotrophomonas* type strains and *P. geniculata* ATCC 19374<sup>T</sup>

|                                                    | <i>S. rhizophila</i><br>DSM14405 <sup>T</sup> | <i>S. pavanii</i><br>LMG25348 <sup>T</sup> | <i>S. nitritireducens</i><br>DSM12575 <sup>T</sup> | <i>S. koreensis</i><br>DSM17805 <sup>T</sup> | <i>P. geniculata</i><br>ATCC 19374 <sup>T</sup> | <i>S. pictorum</i><br>JCM9942 <sup>T</sup> | <i>S. ginsengisoli</i><br>DSM24757 <sup>T</sup> | <i>S. daejeonensis</i><br>JCM16244 <sup>T</sup> | <i>S. bentonitica</i><br>DSM103927 <sup>T</sup> | <i>S. indicatrix</i><br>WS40 <sup>T</sup> | <i>S. acidaminiphila</i><br>JCM13310 <sup>T</sup> | <i>S. humi</i><br>DSM18929 <sup>T</sup> | <i>S. lactitubi</i> M15 <sup>T</sup> | <i>S. chelatiphaga</i><br>DSM21508 <sup>T</sup> | <i>S. maltophilia</i><br>NCTC10257 <sup>T</sup> | <i>S. terrae</i><br>DSM18941 <sup>T</sup> | <i>S. tumulicola</i><br>JCM30961 <sup>T</sup> |
|----------------------------------------------------|-----------------------------------------------|--------------------------------------------|----------------------------------------------------|----------------------------------------------|-------------------------------------------------|--------------------------------------------|-------------------------------------------------|-------------------------------------------------|-------------------------------------------------|-------------------------------------------|---------------------------------------------------|-----------------------------------------|--------------------------------------|-------------------------------------------------|-------------------------------------------------|-------------------------------------------|-----------------------------------------------|
| <i>S. rhizophila</i><br>DSM14405 <sup>T</sup>      | 100                                           | 81.93                                      | 81.14                                              | 77.92                                        | 81.87                                           | 80.26                                      | 78.06                                           | 81.11                                           | 85.51                                           | 82.01                                     | 81.01                                             | 79.89                                   | 81.83                                | 81.68                                           | 81.91                                           | 79.86                                     | 81.20                                         |
| <i>S. pavanii</i><br>LMG25348 <sup>T</sup>         | 81.85                                         | 100                                        | 80.83                                              | 77.74                                        | 90.85                                           | 79.65                                      | 77.76                                           | 80.81                                           | 81.90                                           | 86.77                                     | 80.80                                             | 79.26                                   | 86.82                                | 82.46                                           | 90.99                                           | 79.48                                     | 82.11                                         |
| <i>S. nitritireducens</i><br>DSM12575 <sup>T</sup> | 81.09                                         | 81.03                                      | 100                                                | 78.83                                        | 80.90                                           | 83.87                                      | 78.82                                           | 86.77                                           | 81.50                                           | 80.69                                     | 89.75                                             | 82.62                                   | 80.64                                | 80.35                                           | 81.14                                           | 82.68                                     | 79.94                                         |
| <i>S. koreensis</i><br>DSM17805 <sup>T</sup>       | 77.95                                         | 77.94                                      | 78.86                                              | 100                                          | 77.89                                           | 78.23                                      | 84.52                                           | 78.78                                           | 77.83                                           | 77.81                                     | 78.82                                             | 77.73                                   | 77.68                                | 77.55                                           | 78.02                                           | 78.12                                     | 77.23                                         |
| <i>P. geniculata</i><br>ATCC 19374 <sup>T</sup>    | 81.71                                         | 90.75                                      | 80.79                                              | 77.86                                        | 100                                             | 79.93                                      | 77.91                                           | 80.69                                           | 81.86                                           | 86.79                                     | 80.60                                             | 79.35                                   | 86.88                                | 82.28                                           | 92.37                                           | 79.41                                     | 82.10                                         |
| <i>S. pictorum</i><br>JCM9942 <sup>T</sup>         | 80.08                                         | 79.78                                      | 83.98                                              | 78.04                                        | 79.84                                           | 100                                        | 78.18                                           | 83.11                                           | 80.21                                           | 79.68                                     | 83.14                                             | 82.87                                   | 79.49                                | 79.29                                           | 79.91                                           | 83.44                                     | 79.10                                         |
| <i>S. ginsengisoli</i><br>DSM24757 <sup>T</sup>    | 78.18                                         | 78.05                                      | 78.86                                              | 84.52                                        | 78.09                                           | 78.20                                      | 100                                             | 78.81                                           | 77.90                                           | 77.90                                     | 78.68                                             | 77.71                                   | 77.79                                | 77.70                                           | 78.04                                           | 78.12                                     | 77.38                                         |
| <i>S. daejeonensis</i><br>JCM16244 <sup>T</sup>    | 81.10                                         | 81.00                                      | 86.88                                              | 78.86                                        | 80.75                                           | 83.14                                      | 78.78                                           | 100                                             | 81.09                                           | 80.64                                     | 86.54                                             | 82.65                                   | 80.50                                | 80.44                                           | 80.80                                           | 82.64                                     | 79.97                                         |
| <i>S. bentonitica</i><br>DSM103927 <sup>T</sup>    | 85.46                                         | 81.93                                      | 81.50                                              | 77.61                                        | 81.85                                           | 80.18                                      | 77.75                                           | 81.03                                           | 100                                             | 81.77                                     | 81.18                                             | 79.62                                   | 81.87                                | 81.40                                           | 81.81                                           | 79.68                                     | 81.02                                         |
| <i>S. indicatrix</i><br>WS40 <sup>T</sup>          | 81.94                                         | 86.77                                      | 80.60                                              | 77.65                                        | 86.86                                           | 79.63                                      | 77.74                                           | 80.62                                           | 81.64                                           | 100                                       | 80.48                                             | 79.36                                   | 93.45                                | 82.46                                           | 86.76                                           | 79.54                                     | 82.01                                         |
| <i>S. acidaminiphila</i><br>JCM13310 <sup>T</sup>  | 80.77                                         | 80.80                                      | 89.78                                              | 78.68                                        | 80.61                                           | 83.02                                      | 78.55                                           | 86.40                                           | 81.20                                           | 80.45                                     | 100                                               | 82.35                                   | 80.74                                | 80.11                                           | 80.81                                           | 82.32                                     | 79.66                                         |
| <i>S. humi</i><br>DSM18929 <sup>T</sup>            | 79.75                                         | 79.40                                      | 82.69                                              | 77.59                                        | 79.39                                           | 82.95                                      | 77.66                                           | 82.45                                           | 79.60                                           | 79.41                                     | 82.41                                             | 100                                     | 79.25                                | 79.07                                           | 79.47                                           | 83.46                                     | 78.79                                         |
| <i>S. lactitubi</i> M15 <sup>T</sup>               | 81.73                                         | 86.82                                      | 80.43                                              | 77.54                                        | 86.88                                           | 79.48                                      | 77.62                                           | 80.30                                           | 81.82                                           | 93.37                                     | 80.50                                             | 79.20                                   | 100                                  | 82.50                                           | 86.79                                           | 79.39                                     | 82.05                                         |
| <i>S. chelatiphaga</i><br>DSM21508 <sup>T</sup>    | 81.73                                         | 82.52                                      | 80.43                                              | 77.67                                        | 82.36                                           | 79.38                                      | 77.72                                           | 80.36                                           | 81.54                                           | 82.56                                     | 80.29                                             | 79.08                                   | 82.48                                | 100                                             | 82.50                                           | 79.19                                     | 84.88                                         |
| <i>S. maltophilia</i><br>NCTC10257 <sup>T</sup>    | 81.85                                         | 91.01                                      | 81.01                                              | 77.97                                        | 92.50                                           | 80.20                                      | 77.95                                           | 80.90                                           | 81.96                                           | 86.78                                     | 80.93                                             | 79.50                                   | 86.84                                | 82.56                                           | 100                                             | 79.71                                     | 82.32                                         |
| <i>S. terrae</i><br>DSM18941 <sup>T</sup>          | 79.92                                         | 79.59                                      | 82.76                                              | 77.98                                        | 79.55                                           | 83.42                                      | 77.89                                           | 82.51                                           | 79.74                                           | 79.59                                     | 82.40                                             | 83.39                                   | 79.50                                | 79.20                                           | 79.60                                           | 100                                       | 78.68                                         |
| <i>S. tumulicola</i><br>JCM30961 <sup>T</sup>      | 80.98                                         | 82.06                                      | 79.97                                              | 77.40                                        | 82.01                                           | 79.07                                      | 77.25                                           | 79.76                                           | 80.96                                           | 81.99                                     | 79.71                                             | 78.65                                   | 81.97                                | 84.69                                           | 82.16                                           | 78.75                                     | 100                                           |
