# Supplementary figures and images for: Phylogenomic Analyses of the Genus Pseudomonas Lead to the Rearrangement of Several Species and the Definition of New Genera
Source: MDPI journal article supplement (doi:10.3390/biology10080782), 2021-08-16

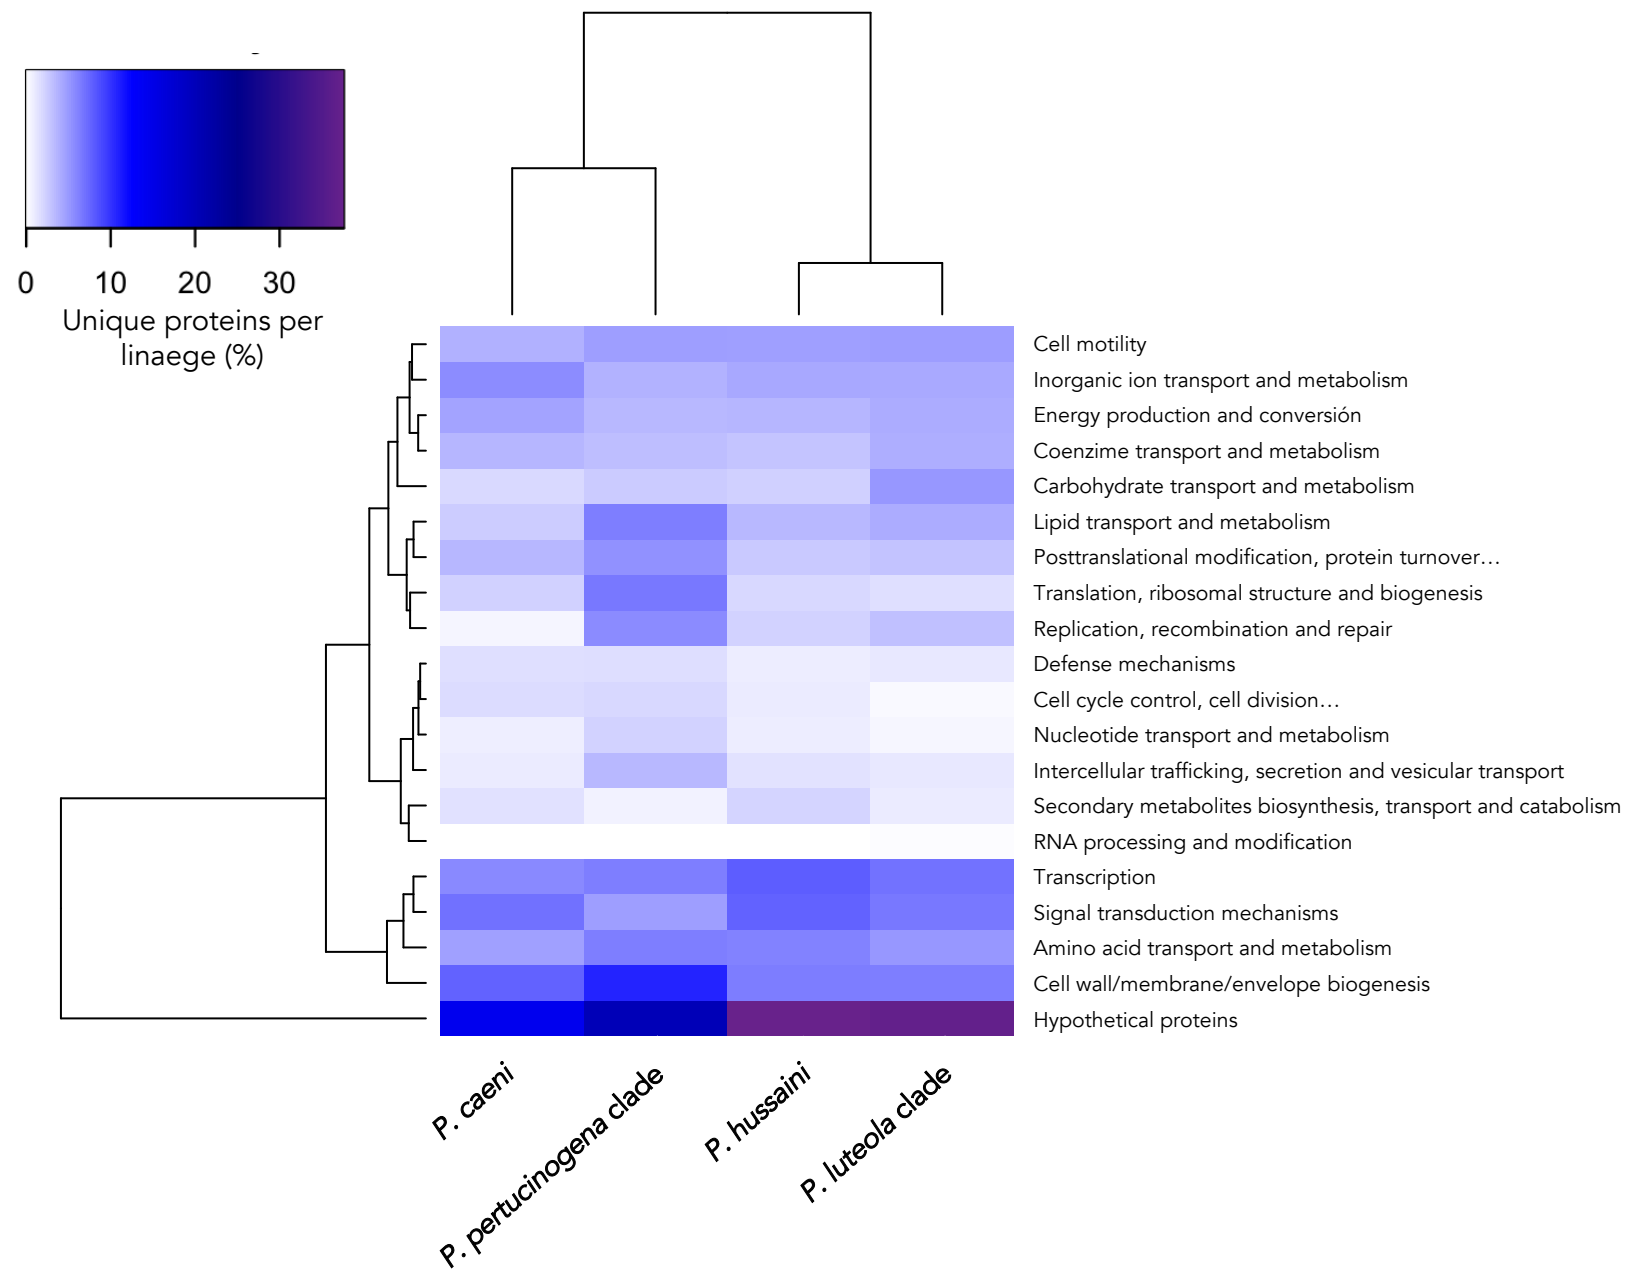

Supplement: s1 [file s1]
